# Supplementary material for: A simple and efficient approach to synthesize amidoborane ammoniates: case study for Mg(NH2BH3)2(NH3)3 with unusual coordination structure
Source: Royal Society of Chemistry journal article supplement (doi:10.1039/c2jm31326j), 2012-01-01
Supplement: c2jm31326j.pdf [file c2jm31326j.pdf]

## Electronic Supplementary Information (ESI)

### A simple and efficient approach to synthesize amidoborane ammoniates: Case study for $\text{Mg}(\text{NH}_2\text{BH}_3)_2(\text{NH}_3)_3$ with unusual coordination structure

Xiangdong Kang,<sup>a</sup> Hui Wu,<sup>bc\*</sup> Junhong Luo,<sup>a</sup> Wei Zhou<sup>bc</sup> and Ping Wang<sup>a\*</sup>

<sup>a</sup>Shenyang National Laboratory for Materials Science, Institute of Metal Research, Chinese Academy of Sciences, Shenyang 110016, China.

<sup>b</sup>NIST Center for Neutron Research, National Institute of Standards and Technology, Gaithersburg, MD 20899-6102, USA.

<sup>c</sup>Department of Materials Science and Engineering, University of Maryland, College Park, Maryland 20742-2115, USA.

E-mail: huiwu@nist.gov, pingwang@imr.ac.cn

#### Details on the Structural Determination of $\text{Mg}(\text{NH}_2\text{BH}_3)_2(\text{NH}_3)_3$ :

The XRD reflections of the  $\text{Mg}(\text{NH}_2\text{BH}_3)_2(\text{NH}_3)_3$  sample can be indexed to a tetragonal structure with lattice parameters of approximately  $a=9.875\text{Å}$  and  $c=20.006\text{Å}$ . Assessment of the extinction symbol associated with the space group of the new phase indicated the most probable to be  $P4/ncc$ . The structure of this new compound was solved by direct-space methods using simulate annealing under this space group. One unit cell contains two Mg in the special positions, one  $\text{NH}_2\text{BH}_3$  group in the general position, two  $\text{NH}_3$  groups in the special positions and one  $\text{NH}_3$  in the general position. Due to the limit number of the laboratory X-ray observations and the uncertain H positions, First-principles molecular dynamics simulated annealing calculations were performed to find the most likely orientations of the  $\text{NH}_2\text{BH}_3$  and  $\text{NH}_3$  groups (see below). Rietveld structural refinement on the optimal structural model was done using the GSAS package<sup>1</sup>. The  $\text{NH}_2\text{BH}_3^-$  and  $\text{NH}_3$  groups were kept as rigid bodies with common refined bond lengths and bond angles constrained as reasonable values due to the inadequate number of observations. B-N, B-H and N-H distances in  $\text{NH}_2\text{BH}_3$  were defined as 1.57 Å, 1.24 Å and 1.018 Å. The N-H distances in  $\text{NH}_3$  were constrained as 1.03 Å. The refinement based on laboratory X-ray data cannot provide highly accurate atomic coordinates, especially for H, hence only positions and not the orientations of  $\text{NH}_3$  units and the rotational orientations along B-N in the  $\text{NH}_2\text{BH}_3$  units were refined. Isotropic displacement parameters were constrained for the same type of atoms or rigid bodies. The cell parameters for the  $P4/ncc$  structure:  $a=9.8908(5)\text{Å}$  and  $c=20.061(1)\text{Å}$ . The

agreement factors are:  $R_{wp}=0.0594$ ,  $R_p=0.0475$  and  $\chi^2=2.191$ . The atomic positions from refinement are listed in Table 1.

First-principles calculations based on density-functional theory (DFT) were performed by using the PWSCF package.<sup>2</sup> We used a Vanderbilt-type ultrasoft potential with Perdew-Burke-Ernzerhof exchange correlation. A cutoff energy of 544 eV and a  $2 \times 2 \times 1$   $k$ -point mesh (generated using the Monkhorst-Pack scheme) were found to be sufficient for the total energy to converge to within 0.1 meV/atom. Car-Parrinello molecular dynamics simulations<sup>3</sup> were used to help in searching for the most likely orientations of the  $\text{NH}_2\text{BH}_3$  and  $\text{NH}_3$  groups. The conventional unit cell was used, with the cell dimensions fixed at the experimental values. The initial system temperature was set to 600 K. The system was first allowed to evolve and equilibrate for 20 ps, and then the system temperature was slowly decreased to 0 K in a period of 20 ps. Structure optimizations on the resulting candidate structures at 0 K were further performed with respect to atomic positions. This information was used in combination with XRD pattern matching to derive the best crystal structure solution of  $\text{Mg}(\text{NH}_2\text{BH}_3)_2(\text{NH}_3)_3$ .

**Table S1.** Experimental and calculated structural parameters of  $\text{Mg}(\text{NH}_2\text{BH}_3)_2(\text{NH}_3)_3$  (Space group  $P4/ncc$  (setting 2), No. 130,  $a=9.8908(5)$  Å,  $c=20.061(1)$  Å, and  $V=1962.5(3)$  Å<sup>3</sup>)

| Atom | Site | x         | y         | z         |
|------|------|-----------|-----------|-----------|
| Mg1  | 4a   | 0.25      | 0.75      | 0.25      |
| B1   | 16g  | 0.1284(4) | 0.5719(3) | 0.1455(2) |
| N1   | 16g  | 0.2725(4) | 0.5663(3) | 0.1799(2) |
| H1   | 16g  | 0.2949    | 0.4749    | 0.2006    |
| H2   | 16g  | 0.3502    | 0.5865    | 0.1481    |
| H3   | 16g  | 0.1402    | 0.5816    | 0.0841    |
| H4   | 16g  | 0.0630    | 0.4715    | 0.1581    |
| H5   | 16g  | 0.0642    | 0.6724    | 0.1647    |
| Mg2  | 4c   | 0.25      | 0.25      | 0.4613(2) |
| N2   | 16g  | 0.2784(5) | 0.4779(3) | 0.4659(2) |
| H6   | 16g  | 0.3617    | 0.4905    | 0.4359    |
| H7   | 16g  | 0.3039    | 0.5231    | 0.5105    |
| H8   | 16g  | 0.2033    | 0.5360    | 0.4444    |
| N3   | 4c   | 0.25      | 0.25      | 0.5702(4) |
| H9   | 16g  | 0.2894    | 0.1648    | 0.5923    |
| H10  | 16g  | 0.1573    | 0.2643    | 0.5923    |
| H11  | 16g  | 0.3085    | 0.3293    | 0.5868    |
| N4   | 4c   | 0.25      | 0.25      | 0.3566(4) |
| H12  | 16g  | 0.2118    | 0.3398    | 0.3388    |
| H13  | 16g  | 0.3452    | 0.2392    | 0.3369    |
| H14  | 16g  | 0.1905    | 0.1751    | 0.3367    |

Note: The uncertainties of the atomic coordinates for hydrogen atoms are not reported here because they were not freely refined. The isotropic thermal parameters ( $U_{\text{iso}}$ ) were constrained to be identical for the same atom type or same rigid bodies:  $U_{\text{Mg}}=1.4(1)$ ,  $U_{\text{NH}_3}=2.0(1)$ ,  $U_{\text{NH}_2\text{BH}_3}=2.2(2)$  ( $\times 100$  Å<sup>2</sup>). All atomic and rigid body positions are fully occupied. H atoms around N3 and N4 are disorderly distributed with occupancies of 0.25 at each 16g general positions.

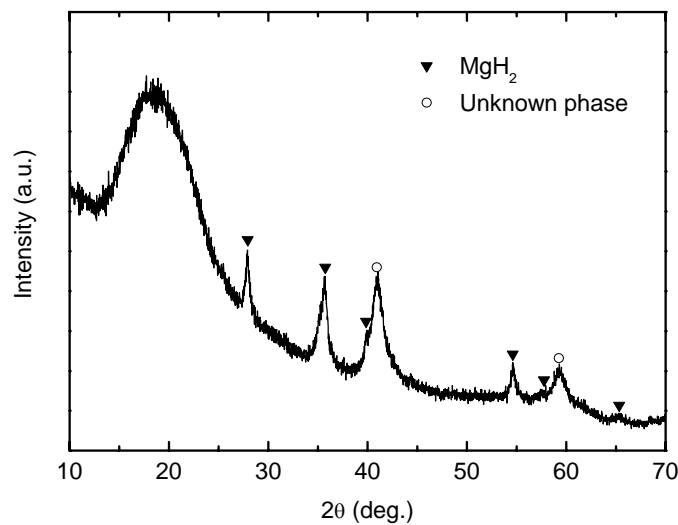

**Fig. S1** XRD pattern of the post-milled MgH<sub>2</sub> under NH<sub>3</sub> atmosphere for 2 h.

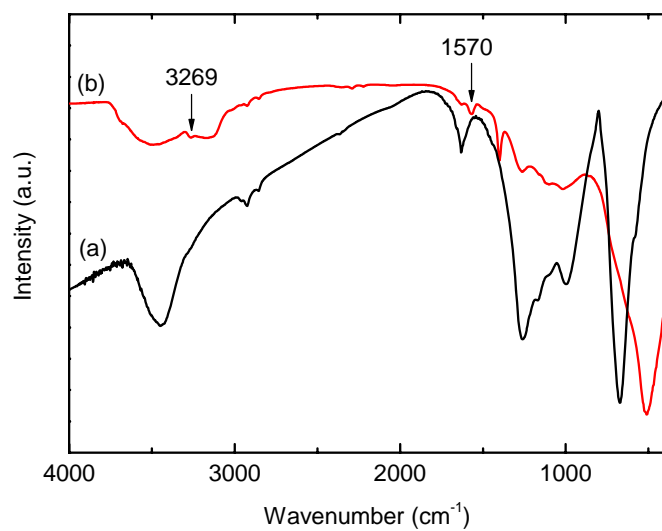

**Fig. S2** FTIR spectra of (a) pristine MgH<sub>2</sub> and (b) the post-milled MgH<sub>2</sub> under NH<sub>3</sub> atmosphere for 2 h. The bands at 3269 and 1570 cm<sup>-1</sup> should be assigned to the N-H bonds of Mg(NH<sub>2</sub>)<sub>2</sub>.

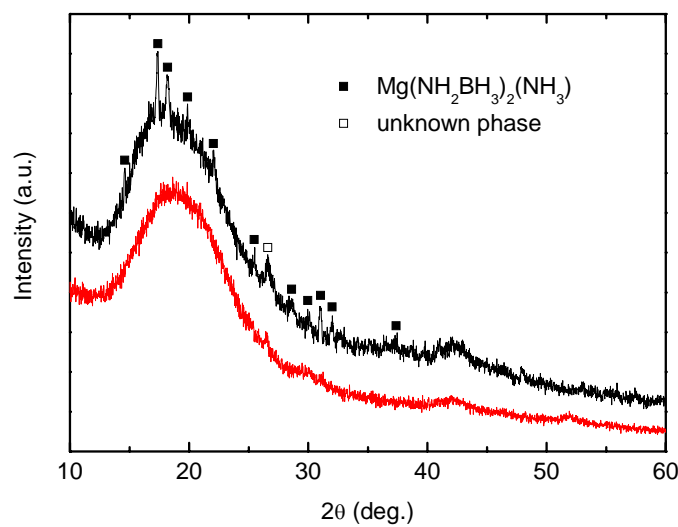

**Fig. S3** XRD patterns of the starting  $\text{MgAB}\cdot\text{NH}_3$  sample (black line) and the post-milled  $\text{MgAB}\cdot\text{NH}_3$  under ammonia atmosphere for 10 min (red line).  $\text{MgAB}\cdot\text{NH}_3$  was prepared as described in Ref. 23. The ball mill conditions of  $\text{MgAB}\cdot\text{NH}_3$  under ammonia atmosphere are identical to that for the preparation of  $\text{MgAB}\cdot 3\text{NH}_3$ . We found that, after ball milling of 10 min, the diffraction peaks of  $\text{MgAB}\cdot\text{NH}_3$  disappeared, but the expected peaks of the  $\text{MgAB}\cdot 3\text{NH}_3$  did not appear. The diffraction intensity of  $\text{MgAB}\cdot 3\text{NH}_3$  was found to decrease a little when it was milled under ammonia atmospheres even for 10 h. Therefore, we deduced that the interaction of  $\text{MgAB}\cdot\text{NH}_3$  and ammonia gas during ball milling process may lead to an amorphorization of the  $\text{MgAB}\cdot\text{NH}_3$  or the production of other amorphous phase, but did not form  $\text{MgAB}\cdot 3\text{NH}_3$ .

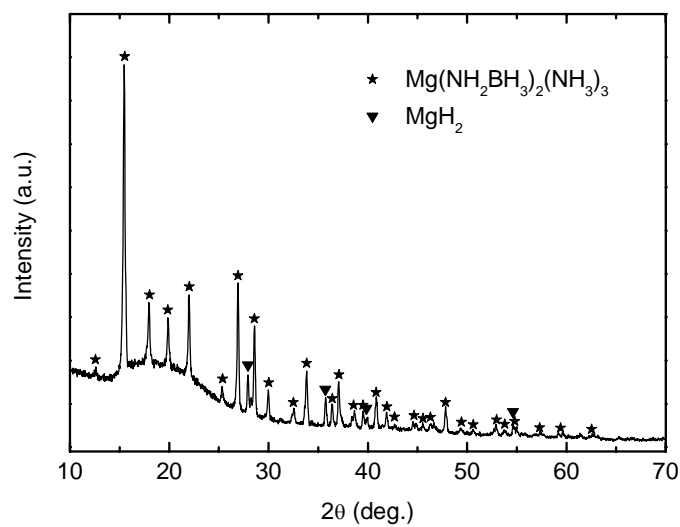

**Fig. S4** XRD pattern of the post-milled  $\text{MgH}_2$  together with the liquid  $\text{AB}(\text{NH}_3)_n$  complexes for 10 min.

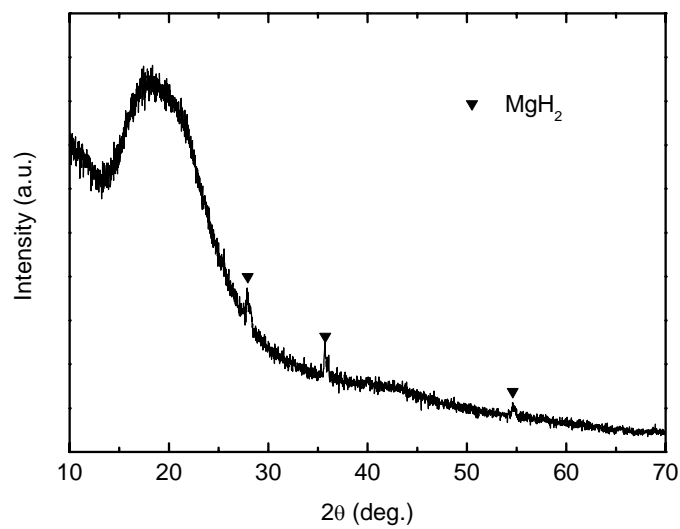

**Fig. S5** XRD pattern of the post-heated  $\text{MgAB}\cdot 3\text{NH}_3$  up to 300 °C.

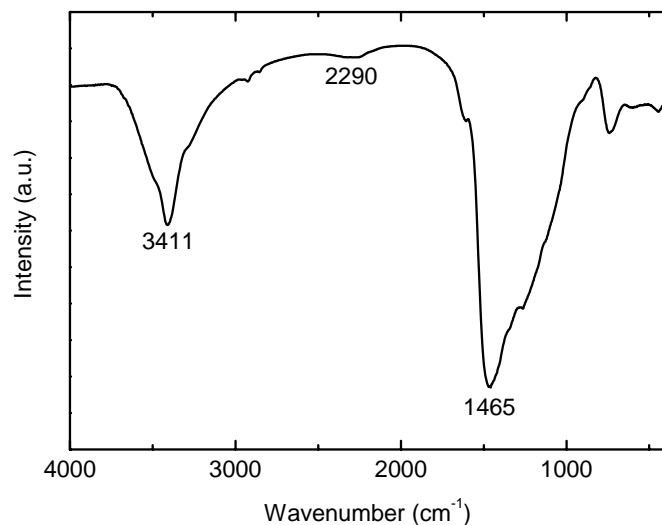

**Fig. S6** FTIR spectrum of the post-heated MgAB·3NH<sub>3</sub> up to 300 °C.

Reference:

- (1) Larson A. C., Von Dreele, R. B. *General Structure Analysis System*, Report LAUR 86-748. Los Alamos National Laboratory, NM, 1994.
- (2) Giannozzi, P.; Baroni, S.; Bonini, N.; Calandra, M.; Car, R.; Cavazzoni, C.; Ceresoli, D.; Chiarotti, G. L.; Cococcioni, M.; Dabo, I.; Dal Corso, A.; Fabris, S.; Fratesi, G.; de Gironcoli, S.; Gebauer, R.; Gerstmann, U.; Gougoussis, C.; Kokalj, A.; Lazzeri, M.; Martin-Samos, L.; Marzari, N.; Mauri, F.; Mazzarello, R.; Paolini, S.; Pasquarello, A.; Paulatto, L.; Sbraccia, C.; Scandolo, S.; Sclauzero, G.; Seitsonen, A. P.; Smogunov, A.; Umari, P.; Wentzcovitch, R. M. *J. Phys.: Condens. Matter* 2009, 21, 395502.
- (3) Car, R.; Parrinello, M. *Phys. Rev. Lett.* 1985, 55, 2471.
